# Supplementary material
Source: PubMed Central journal article supplement (PMC7393198)
Supplement: BPH-177-3828-s001.pdf [file BPH-177-3828-s001.pdf]

## Supplementary information

**Title:** High glucose-mediated PICALM and mTORC1 modulate processing of amyloid precursor protein via endosomal abnormalities

**Running title:** Effect of high glucose on APP-processing endosome

Chang Woo Chae<sup>1</sup>, Hyun Jik Lee<sup>4,5</sup>, Gee Euhn Choi<sup>1</sup>, Young Hyun Jung<sup>1</sup>, Jun Sung Kim<sup>1</sup>, Jae Ryong Lim<sup>1</sup>, Seo Yihl Kim<sup>1</sup>, In Koo Hwang<sup>2,3</sup>, Je Kyung Seong<sup>2,3</sup> and Ho Jae Han<sup>1,\*</sup>

<sup>1</sup>Department of Veterinary Physiology, College of Veterinary Medicine, Research Institute for Veterinary Science, and BK21 PLUS Program for Creative Veterinary Science Research, Seoul National University, Seoul 08826, Republic of Korea.

<sup>2</sup>BK21 PLUS Program for Creative Veterinary Science Research, and Research Institute for Veterinary Science; Seoul National University and Korea Mouse Phenotyping Center (KMPC), Seoul, Korea.

<sup>3</sup>Department of Anatomy and Cell Biology, College of Veterinary Medicine, and Research Institute for Veterinary Science, Seoul National University, Seoul 08826, South Korea.

<sup>4</sup>Laboratory of Veterinary Physiology, College of Veterinary Medicine, Chungbuk National University, Cheongju, Chungbuk 28644, South Korea.

<sup>5</sup>Institute for Stem Cell & Regenerative Medicine (ISCRM), Chungbuk National University, Cheongju, 28644, Chungbuk, Korea.

\*Corresponding author: Ho Jae Han, D.V. M, Ph.D

Professor of Department of Veterinary Physiology

College of Veterinary Medicine, Seoul National University, Seoul 08826, Republic of Korea

E-mail address: [hjhan@snu.ac.kr](mailto:hjhan@snu.ac.kr)

Tel / Fax: +82-2-880-1261 / +82-2-880-2732

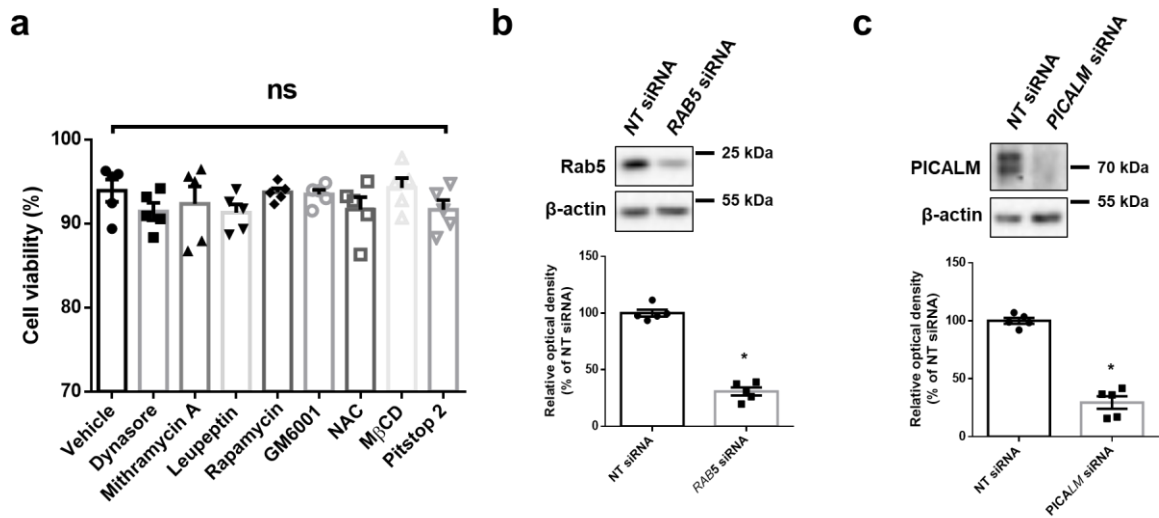

**Figure S1. The efficacy of siRNAs and toxic effects of drugs used in experiments.** **a** The cells were treated with vehicle or drugs, Dynasore (25  $\mu$ M), Mithramycin A (25 nM), Leupeptin (100 nM), Rapamycin (200 nM), GM6001 (20  $\mu$ M), NAC (4 mM), M $\beta$ CD (1 mM), and Pitstop 2 (30  $\mu$ M), respectively for 24 h. Cell viability was measured by trypan blue exclusion cell viability assay.  $n = 5$  from independent experiments. **b** The SK-N-MCs were transfected with NT siRNA or *RAB5* siRNA for 12 h and incubated in medium for 24 h. Rab5 were detected by western blot.  $n = 5$  from independent experiments. **c** The cells were transfected with NT siRNA or *PICALM* siRNA for 12 h and incubated in medium for 24 h. PICALM were detected by western blot.  $n = 5$  from independent experiments.  $*p < 0.05$  vs. NT siRNA transfection. Quantitative data are presented as a mean  $\pm$  S.E.M. All blots are representative.

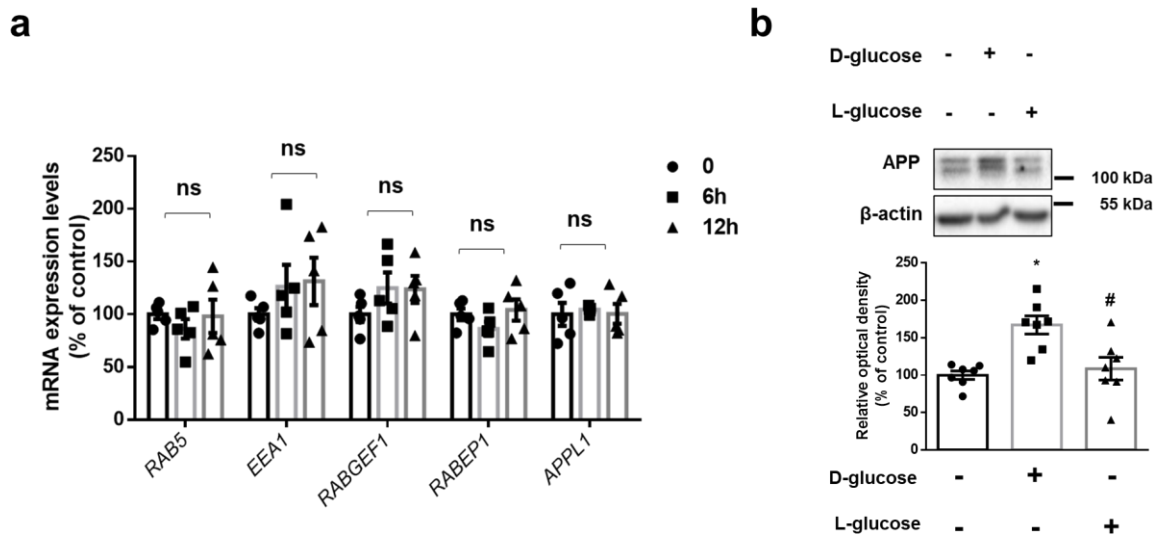

**Figure S2. High glucose has no significant alterations on the mRNA expression of Rab5 and its effector proteins.** **a** The SK-N-MCs were treated with high glucose (25 mM) in a time dependent manner. The mRNA expression levels of *RAB5*, *EEA1*, *RABGEF1*, *RABEP1*, and *APPL1* were analyzed by quantitative real-time PCR.  $n = 5$  from independent experiments with 2 technical replicates each. **b** The cells were treated with D-glucose (25 mM) or L-glucose (25 mM) for 24 h. Then, APP and  $\beta$ -actin were detected by western blot.  $n = 7$  from independent experiments. \* $p < 0.05$  vs. control, # $p < 0.05$  vs. D-glucose. Quantitative data are presented as a mean  $\pm$  S.E.M. All blots are representative.

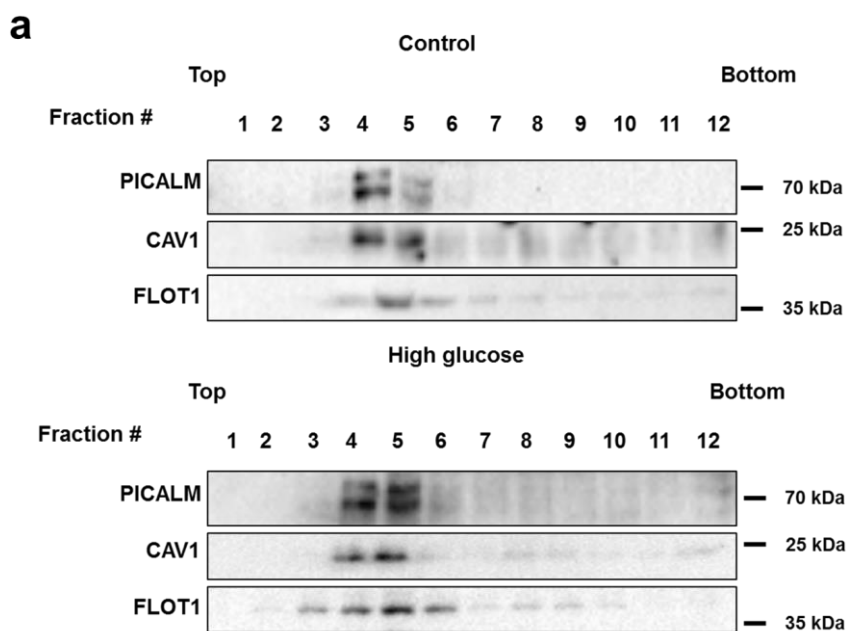

**Figure S3. PICALM is located in lipid rafts under both normal- and high glucose-conditions.** a High glucose (25 mM) were treated for 24 h in the cells. Sucrose gradient-fractionized lysates were subjected to western blot. PICALM, CAV1, and FLOT1 were detected. Exploratory data.

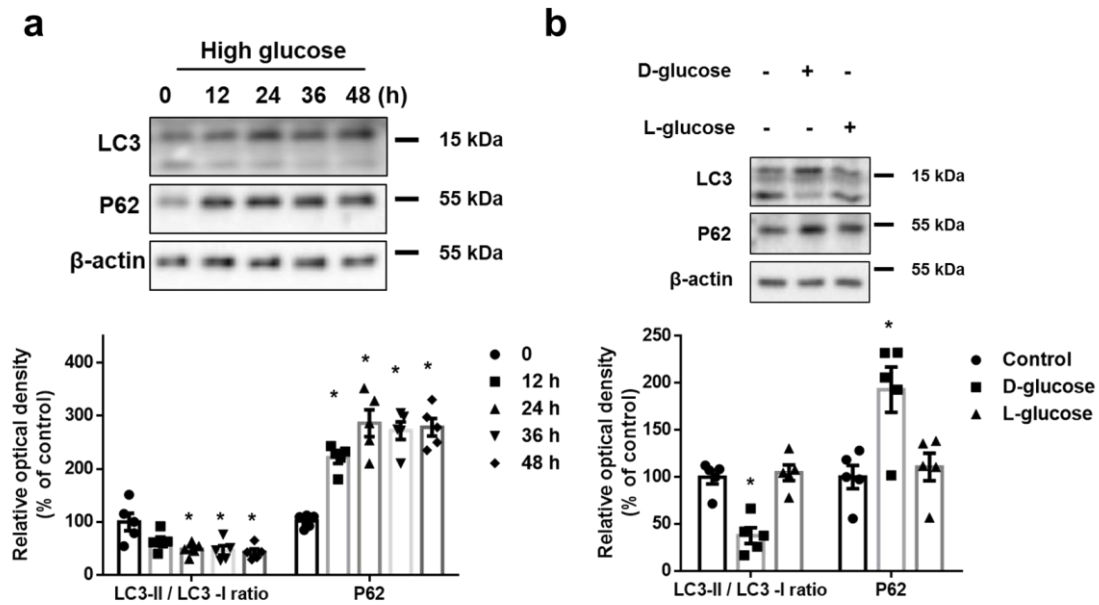

**Figure S4. High glucose impairs autophagy in a time dependent manner.** **a** The SK-N-MCs were treated with high glucose (25 mM) in a time dependent manner. LC3, P62, and  $\beta$ -actin were subjected to western blot.  $n = 5$  from independent experiments. **b** The cells were treated with D-glucose (25 mM) or L-glucose (25 mM) for 24 h. Then, LC3, P62, and  $\beta$ -actin were detected by western blot.  $n = 5$  from independent experiments.  $*p < 0.05$  vs. control. Quantitative data are presented as a mean  $\pm$  S.E.M. All blots are representative.

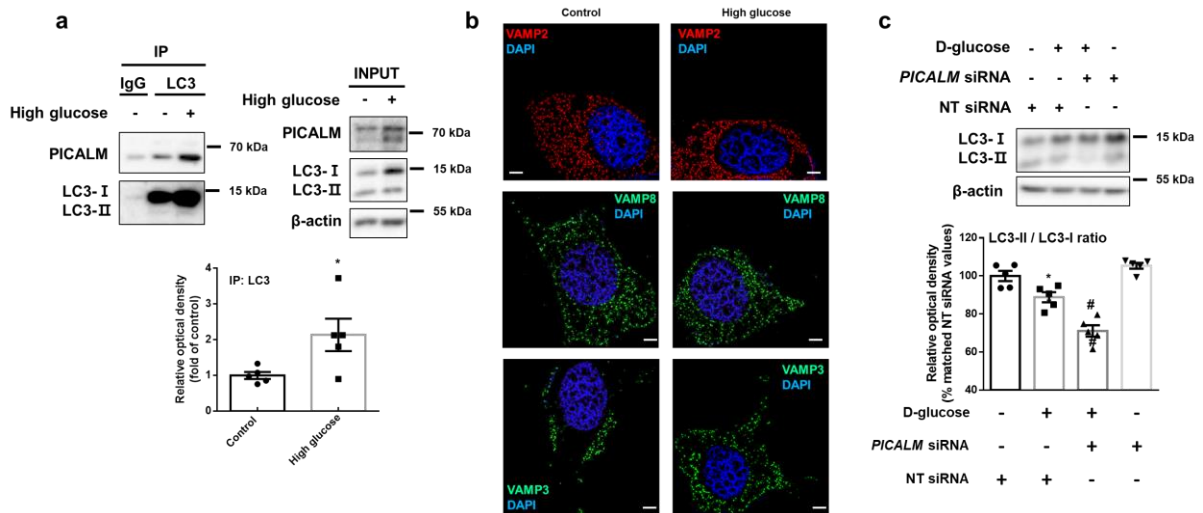

**Figure S5. PICALM induces autophagy under high glucose conditions.** **a, b** The SK-N-MCs were treated with high glucose (25 mM) for 24 h. **a** Co-immunoprecipitation of PICALM with IgG and LC3 antibodies were shown in left panel. Total protein expressions in lysate were shown in right panel.  $n = 5$  from independent experiments. \* $p < 0.05$  vs. Control. **b** The cells were immunostained with VAMP2 or VAMP8 or VAMP3-specific antibodies and counterstained with DAPI. Scale bars, 8  $\mu$ m (magnification,  $\times 1,000$ ).  $n = 5$  from independent experiments. Exploratory data. **c** The cells were transfected with NT siRNA or *PICALM* siRNA for 12 h prior to high glucose (25 mM) treatment for 24 h. LC3 and  $\beta$ -actin were detected by western blot.  $n = 5$  from independent experiments. Logarithmic transformations were performed for homogeneity of the sample variance. \* $p < 0.05$  vs. NT siRNA transfection, # $p < 0.05$  vs. NT siRNA transfection + high glucose. Quantitative data are presented as a mean  $\pm$  S.E.M. All blots and immunofluorescence images are representative.

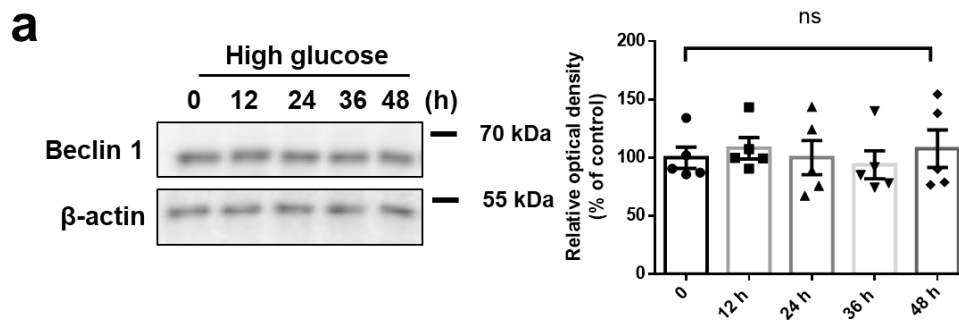

**Figure S6. High glucose has no significant alterations on the protein expression of Beclin1.** The SK-N-MCs were treated with high glucose (25 mM) in a time dependent manner. The Beclin1 were detected by western blot.  $n = 5$  from independent experiments. Quantitative data are presented as a mean  $\pm$  S.E.M. All blots are representative.

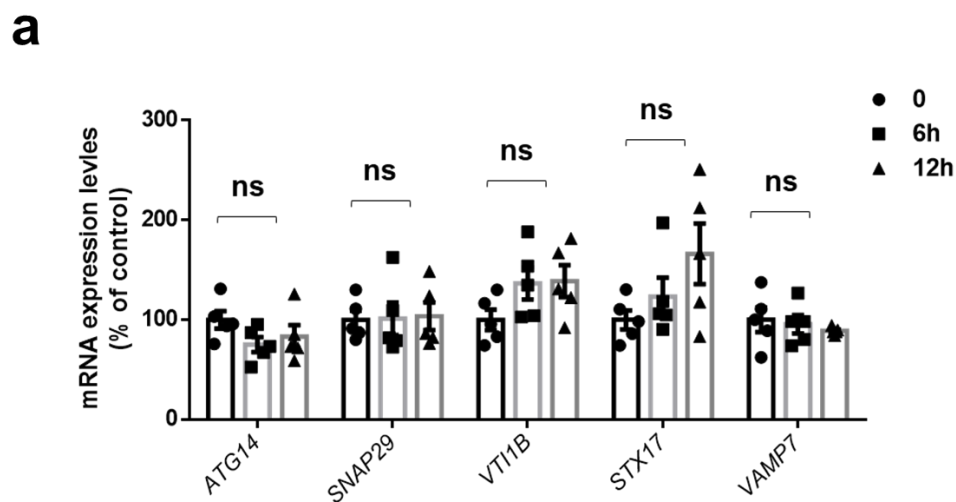

**Figure S7. High glucose has no significant alterations on the mRNA expression of endo-lysosomal fusion related proteins.** **a** The SK-N-MCs were treated with high glucose (25 mM) in a time dependent manner. The mRNA expression levels of *ATG14*, *SNAP29*, *VTI1B*, *STX17*, and *VAMP7* were analyzed by quantitative real-time PCR.  $n = 5$  from independent experiments with 2 technical replicates each. Quantitative data are presented as a mean  $\pm$  S.E.M.

**a**

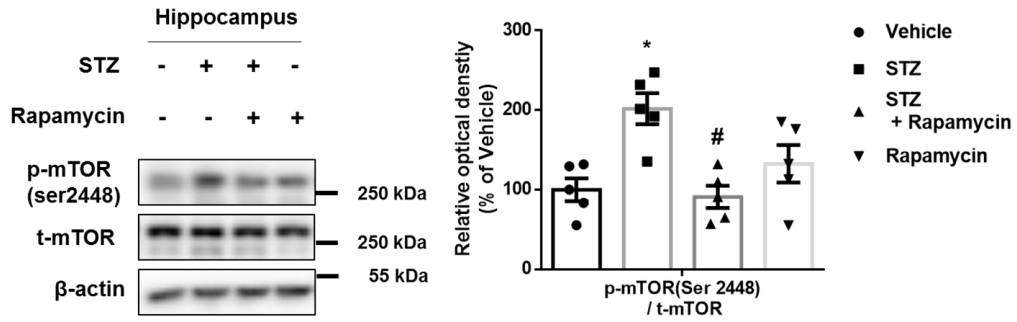

**Figure S8. The treatment of rapamycin attenuated STZ-induced phosphorylation of mTORC1.** **a** Hippocampal sample was obtained from vehicle-, STZ-, STZ + rapamycin-, or rapamycin-treated mice. Then, p-mTOR (Ser 2448), t-mTOR, and β-actin were subjected to western blot.  $n = 5$  in each animal. \* $p < 0.05$  vs. vehicle-treated mice, # $p < 0.05$  vs. STZ-treated mice. Quantitative data are presented as a mean  $\pm$  S.E.M. All blots are representative.



**Table S1. Body weight and blood glucose levels in ZLC and ZDF rats.** Blood glucose and body weight were determined with a portable glucose monitor at 6 and 33 weeks of age. Data are presented as a mean  $\pm$  S.E.M.

|                                 | ZLC              | ZDF               |
|---------------------------------|------------------|-------------------|
| Body weight (g), 6 weeks        | 119 $\pm$ 1.82   | 144.4 $\pm$ 5.22  |
| Body weight (g), 33 weeks       | 394.2 $\pm$ 9.05 | 355.2 $\pm$ 6.77  |
| Blood glucose (mg/dl), 6 weeks  | 102.8 $\pm$ 5.38 | 153.3 $\pm$ 15.85 |
| Blood glucose (mg/dl), 33 weeks | 124.5 $\pm$ 5.05 | 575.9 $\pm$ 25.53 |

**Table S2. Body weight and blood glucose levels in experimental mice.** Blood glucose and body weight were determined with a portable glucose monitor at 9 and 18 weeks of age. Data are presented as a mean  $\pm$  S.E.M.

|                                 | Vehicle          | Dynasore         | STZ               | STZ + Dynasore    |
|---------------------------------|------------------|------------------|-------------------|-------------------|
| Body weight (g), 9 weeks        | 38.5 $\pm$ 0.42  | 37.17 $\pm$ 0.7  | 37.5 $\pm$ 1.58   | 39 $\pm$ 0.63     |
| Body weight (g), 18 weeks       | 42.33 $\pm$ 1.45 | 44.83 $\pm$ 0.87 | 34.83 $\pm$ 1.62  | 42.6 $\pm$ 1.20   |
| Blood glucose (mg/dl), 9 weeks  | 116.3 $\pm$ 4.64 | 137.7 $\pm$ 7.08 | 120.3 $\pm$ 15.02 | 135.7 $\pm$ 7.24  |
| Blood glucose (mg/dl), 18 weeks | 126.7 $\pm$ 6.29 | 131.8 $\pm$ 4.64 | 497.7 $\pm$ 20.49 | 439.6 $\pm$ 35.16 |

|                                 | Vehicle          | Rapamycin        | STZ              | STZ + rapamycin   |
|---------------------------------|------------------|------------------|------------------|-------------------|
| Body weight (g), 9 weeks        | 37.33 $\pm$ 0.33 | 36.33 $\pm$ 1.08 | 37 $\pm$ 1.09    | 37.67 $\pm$ 0.55  |
| Body weight (g), 18 weeks       | 44.83 $\pm$ 1.24 | 43.5 $\pm$ 0.92  | 40.67 $\pm$ 1.47 | 46.67 $\pm$ 1.145 |
| Blood glucose (mg/dl), 9 weeks  | 126.7 $\pm$ 7.37 | 116.5 $\pm$ 7.85 | 118.2 $\pm$ 9.26 | 118.5 $\pm$ 5.38  |
| Blood glucose (mg/dl), 18 weeks | 127.3 $\pm$ 8.78 | 120.8 $\pm$ 6.39 | 484.7 $\pm$ 5.94 | 503.7 $\pm$ 10.56 |

**Table S3. Human gene primers for real-time qPCR.**

| Gene symbol    | Alias/Common name                                                                | Primer sequence (5'-3')                   |
|----------------|----------------------------------------------------------------------------------|-------------------------------------------|
| <i>PICALM</i>  | Phosphatidylinositol Binding Clathrin Assembly Protein                           | F-TTC CTG TTG CCA AAC TCC CA              |
|                |                                                                                  | R-TGG TTC CAT TTC CGA TGC CA              |
| <i>AP2A1</i>   | Adaptor Related Protein Complex 2 Subunit Alpha 1                                | F- TCC TGC TTG GCC ATG ACA TT             |
|                |                                                                                  | R-AGT TCG AGT TCA CCA GCA CA              |
| <i>RAB5A</i>   | RAB5A, Member RAS Oncogene Family                                                | F- CAT TGG GGC TGC TTT TCT AA             |
|                |                                                                                  | R- GGA CTT GCT TGC CTC TGAAG              |
| <i>EEA1</i>    | Early Endosome Antigen 1                                                         | F- TGC ATC TGAAAC CTC ACT GC              |
|                |                                                                                  | R- CTA GTT GGC GCT CTG TCT CC             |
| <i>RABGEF1</i> | RAB Guanine Nucleotide Exchange Factor 1                                         | F-AAG CCT CCG AAT CAA CCG TT              |
|                |                                                                                  | R-TGC AGT GGT GGA GGAAGT TT               |
| <i>RABEP1</i>  | Rabaptin, RAB GTPase Binding Effector Protein 1                                  | F-TCC AGA TGC CAA GTG GGT TT              |
|                |                                                                                  | R-TGT TCT GGT GTC ATC GCC TT              |
| <i>APPL1</i>   | Adaptor Protein, Phosphotyrosine Interacting With PH Domain And Leucine Zipper 1 | F-AGC GTT TTC CAT TGG GAG GT              |
|                |                                                                                  | R-AGC ACT GCA TGA CAA GAG CT              |
| <i>ATG14</i>   | Autophagy Related 14                                                             | F-ACA ACG GAG ACA CCA GCA TT              |
|                |                                                                                  | R-ACC AGC TGA GTT GCA TAG CA              |
| <i>SNAP29</i>  | Synaptosome Associated Protein 29                                                | F-ACC CAA AGA ACC CAC ACC TT              |
|                |                                                                                  | R-TGT CAG CCG GTC AAG AAT GT              |
| <i>VT11B</i>   | Vesicle Transport Through Interaction With T-SNAREs 1B                           | F-TTT CGA GAA GCT GCA CGA GA              |
|                |                                                                                  | R-TGC CAG CGT TTC ATT TGC TT              |
| <i>STX17</i>   | Syntaxin 17                                                                      | F-AAA TGC TGC AGA ATC GTG GG              |
|                |                                                                                  | R-AAG TCA GTG ACC AGT TGG CT              |
| <i>VAMP7</i>   | Vesicle Associated Membrane Protein 7                                            | F-TGAACG TTC CCG AGC CTT TA               |
|                |                                                                                  | R-ATG GAA GTG CTG TCT GTG CT              |
| <i>ACTB</i>    | Actin Beta                                                                       | F-AAC CGC GAG AAG ATG ACC CAG ATC ATG     |
|                |                                                                                  | TTT                                       |
|                |                                                                                  | R-AGC AGC CGT GGC CAT CTC TTG CTC GAA GTC |
